# Supplementary material
Source: Copernicus journal article supplement (doi:10.5194/gmd-19-5381-2026)
Supplement: Supplementary file 1 [file gmd-19-5381-2026-supplement.pdf]

Supplement of Geosci. Model Dev., 19, 5381–5399, 2026  
<https://doi.org/10.5194/gmd-19-5381-2026-supplement>  
Public domain. CC0 1.0.

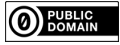

*Supplement of*

## **The path to FAIR research models: lessons learned**

**Albert J. Kettner et al.**

*Correspondence to:* Albert J. Kettner ([kettner@colorado.edu](mailto:kettner@colorado.edu))

The copyright of individual parts of the supplement might differ from the article licence.

## Supplement

### Supplement Table 1.

Data for Figure 1, the relative proportion of domain tags for the two model catalogs at the time of the writing of this paper. A single model may have more than one domain tag.

| Domain                    | CSDMS | USGS |
|---------------------------|-------|------|
| Hydrology                 | 221   | 89   |
| Terrestrial               | 288   | 18   |
| Coastal                   | 113   | 2    |
| Marine                    | 75    | 7    |
| Ecosystems                | 28    | 23   |
| Climate                   | 41    | 7    |
| Cryosphere                | 40    | 1    |
| Geodynamic                | 25    | 15   |
| Geologic or Hydrogeologic | 0     | 34   |
| Human Dimensions          | 5     | 10   |
| Atmosphere                | 0     | 1    |
| Natural Resources         | 0     | 1    |

### Supplement Table 2.

10

USGS Model Catalog metadata fields. See more information at: [https://github.com/DOI-USGS/modelcatalog-tam/blob/main/metadata\\_schema/BasicProfileSchema.py](https://github.com/DOI-USGS/modelcatalog-tam/blob/main/metadata_schema/BasicProfileSchema.py) (last access: May 2026), which is a copy of the USGS software release (Serna, B. S. and Hsu, L.: USGS Model Catalog Tools and Metadata, U.S. Geological Survey, <https://doi.org/10.5066/P9WU0F71>, 2022.).

15

| field                             | description                                                                                                                                                                                                                   |
|-----------------------------------|-------------------------------------------------------------------------------------------------------------------------------------------------------------------------------------------------------------------------------|
| <b>item_type*</b>                 | Model, tool, framework, testbed                                                                                                                                                                                               |
| <b>name*</b>                      | Name of model, recommended format: "Acronym/Short name - longer description"                                                                                                                                                  |
| <b>description*</b>               | General description of the model, recommended length of 4-5 sentences. HTML is allowed.                                                                                                                                       |
| <b>organization*</b>              | True = USGS; False = external only                                                                                                                                                                                            |
| <b>external_organization_name</b> | Organization(s) other than USGS related to the model.                                                                                                                                                                         |
| <b>release_date</b>               | Date, in YYYY-MM-DD format. May be year only.                                                                                                                                                                                 |
| <b>last_update</b>                | Date, in YYYY-MM-DD format. May be year only.                                                                                                                                                                                 |
| <b>person</b>                     | Person(s) (author(s) or developer(s)) responsible for maintenance of the model or item or content.                                                                                                                            |
| <b>version</b>                    | Latest release version, ex. v1.0                                                                                                                                                                                              |
| <b>how_to_cite</b>                | Preferred citation format: Authors, Year, Title, Publisher, DOI.                                                                                                                                                              |
| <b>usgs_missionarea</b>           | USGS Mission Area                                                                                                                                                                                                             |
| <b>identifier</b>                 | Identifiers related to the model, especially the identifier assigned by the USGS identifier tool                                                                                                                              |
| <b>programming_language</b>       | Primary programming language(s) used for the modeling                                                                                                                                                                         |
| <b>license</b>                    | Software license, Default to CC0 see: <a href="https://creativecommons.org/publicdomain/zero/1.0/legalcode">https://creativecommons.org/publicdomain/zero/1.0/legalcode</a> (last access: May 2026)                           |
| <b>data</b>                       | Custom object containing data section                                                                                                                                                                                         |
| <b>software</b>                   | Custom object containing software section                                                                                                                                                                                     |
| <b>publications</b>               | Custom object containing publications section                                                                                                                                                                                 |
| <b>other_links</b>                | Custom object containing other links section                                                                                                                                                                                  |
| <b>science_keywords</b>           | Topical science keywords that will help for discovering the item. Terms must come from the USGS Thesaurus please see: <a href="https://apps.usgs.gov/thesaurus/">https://apps.usgs.gov/thesaurus/</a> (last access: May 2026) |

|                                    |                                                                                                                                                               |
|------------------------------------|---------------------------------------------------------------------------------------------------------------------------------------------------------------|
| <b>type_keywords</b>               | Keywords describing the type of model. For example, "Numerical"                                                                                               |
| <b>other_keywords</b>              | Other keywords that are not in the USGS Thesaurus or other controlled keyword lists. For example, platform and mode (Jupyter, Graphical User Interface, etc). |
| <b>image</b>                       | Header image for the model profile page                                                                                                                       |
| <b>related_modelcatalog_assets</b> | Related catalog items for the model                                                                                                                           |

Supplement Table 3.

20 Community Surface Dynamics Modeling System metadata fields. See more information at: [https://csdms.colorado.edu/wiki/Available\\_model\\_questionnaire\\_conditions](https://csdms.colorado.edu/wiki/Available_model_questionnaire_conditions) (last access: May 2026).

| <b>field</b>                | <b>description</b>                                                                                           |
|-----------------------------|--------------------------------------------------------------------------------------------------------------|
| <b>model name*</b>          |                                                                                                              |
| <b>Model_also_known_as</b>  | Additional field to hold an alternative name for a model, for if the model is also known under another name. |
| <b>ModelFramework</b>       | Describe the model framework, if the model is part of a larger framework.                                    |
| <b>Incorporated_modules</b> | Include names of module or components, if the model incorporates one or more of these.                       |
| <b>Model_type*</b>          | Describe if a model is more like a tool, build out of multiple modules or is just a single model.            |
| <b>ModelDomain</b>          | The various domains (marine, terrestrial, hydrological, etc.) a model simulates                              |
| <b>Spatial_dimensions</b>   | Range or specific spatial dimensions a model operates under (1D, 2D, etc.).                                  |
| <b>Spatialscale</b>         | Spatial extent of simulated domain                                                                           |

|                                    |                                                                                                    |
|------------------------------------|----------------------------------------------------------------------------------------------------|
| <b>One-line_model_description*</b> | Short description of the model                                                                     |
| <b>Extended_model_description*</b> | Extended description of the model                                                                  |
| <b>Model_keywords</b>              | Keywords describing the model.                                                                     |
| <b>First_name*</b>                 | Given name of contact person                                                                       |
| <b>Last_name*</b>                  | Family name of contact person                                                                      |
| <b>Type_of_contact</b>             | State where contact person is located                                                              |
| <b>Institute</b>                   | Affiliated institute of contact person                                                             |
| <b>Postal_address1</b>             | Address of contact person                                                                          |
| <b>Postal_address2</b>             | Additional field for address of contact person                                                     |
| <b>City*</b>                       | City or name of town where institute contact person is located                                     |
| <b>Postal code*</b>                | Postal code of institute                                                                           |
| <b>Country*</b>                    | Country where contact person is located                                                            |
| <b>State</b>                       | State where contact person is located                                                              |
| <b>Email_address*</b>              | Email address of contact person                                                                    |
| <b>Phone</b>                       | Phone number of contact person                                                                     |
| <b>Fax</b>                         | Fax number of contact person                                                                       |
| <b>Supported_platforms</b>         | Supported computer platforms by the model (Mac, Windows, etc.)                                     |
| <b>Supported_platforms_other</b>   | Define other than the platform options indicated under 'Supported platforms' the model can run on. |
| <b>Programming_language</b>        | Identify the used program language                                                                 |
| <b>Programming_language_other</b>  | Define other than the program languages indicated under 'Programming language' used                |
| <b>Code_optimized</b>              | Indicate if the model uses single or multiple processors                                           |
| <b>Start_year_development</b>      | The first year the model was developed                                                             |
| <b>Development_still_active*</b>   | Indicates if model development is still ongoing                                                    |
| <b>End_year_development</b>        | The year model development ended                                                                   |

|                                                       |                                                                                                                  |
|-------------------------------------------------------|------------------------------------------------------------------------------------------------------------------|
| <b>Model_availability</b>                             | How the model is made available to the community, "As code" or "As teaching tool"                                |
| <b>Source_code_availability</b>                       | Pointer towards repository where source code can be found "Through web repository" or "Through CSDMS repository" |
| <b>Program_license_type*</b>                          | Source code license                                                                                              |
| <b>Memory_requirements</b>                            | Memory requirements to run model                                                                                 |
| <b>Run_time_model</b>                                 | Typical run time for model                                                                                       |
| <b>Describe_input_parameters_model</b>                | Describe input parameters                                                                                        |
| <b>Input_format_model</b>                             | Describe input format, "ASCII" or "Binary"                                                                       |
| <b>Input_format_model_other</b>                       | Describe alternative input formats                                                                               |
| <b>Describe_output_parameters_model</b>               | Describe output parameters                                                                                       |
| <b>Output_format_model</b>                            | Describe output format, "ASCII" or "Binary"                                                                      |
| <b>Output_format_model_other</b>                      | Describe alternative output formats                                                                              |
| <b>Pre_processing_software</b>                        | Indicate if pre-processing software is needed                                                                    |
| <b>Describe_pre-processing_software</b>               | If pre-processing software is needed, indicate which packages could be used                                      |
| <b>Post_processing_software</b>                       | Indicate if post-processing software is needed                                                                   |
| <b>Describe_post-processing_software</b>              | If post-processing software is needed, indicate which packages could be used                                     |
| <b>Visualization_software_needed</b>                  | Indicate if visualization software is needed                                                                     |
| <b>Visualization_software</b>                         | If visualization software is needed, indicate which packages                                                     |
| <b>Visualization_software_other</b>                   | Indicate alternative visualization packages that can be used                                                     |
| <b>Describe_processes</b>                             | Describe processes represented by the module                                                                     |
| <b>Describe_key_physical_parameters_and_equations</b> | Describe key physical parameters and equations                                                                   |
| <b>Describe_length_scale_and_resolution</b>           | Describe length scale and resolution constraints                                                                 |
| <b>Describe_time_scale_and_resolution</b>             | Describe time scale and resolution constraints                                                                   |

|                                            |                                                                           |
|--------------------------------------------|---------------------------------------------------------------------------|
| <b>Describe_numerical_limitations</b>      | Describe any numerical limitations and issues                             |
| <b>Describe_available_calibration_data</b> | Describe available calibration data sets                                  |
| <b>Model_calibration_data</b>              | Upload calibration data sets if available                                 |
| <b>Describe_available_test_data_sets</b>   | Describe available test data sets                                         |
| <b>Model_test_data</b>                     | Upload test data sets if available                                        |
| <b>Describe_ideal_data_for_testing</b>     | Describe ideal data for testing                                           |
| <b>Current_future_collaborators</b>        | Indicate current or future plans for collaborating with other researchers |
| <b>Manual_model_available</b>              | Indicate if a manual is available                                         |
| <b>Model_manual</b>                        | Option to upload a model manual                                           |
| <b>Model_website</b>                       | URL of external model website                                             |
| <b>Model_forum</b>                         | URL to module forum / discussion board                                    |
| <b>Additional_comments_model</b>           | Additional comments                                                       |
| <b>CodeReviewed</b>                        | If source code is reviewed through e.g. JOSS publication or not           |
| <b>Code_openmi_compliant_or_not</b>        | If module is openmi compliant                                             |
| <b>Code_IRF_or_not</b>                     | If module is BMI compliant                                                |
| <b>Code_CMT_compliant_or_not</b>           | If module is WMT compliant                                                |
| <b>DOI_model</b>                           | DOI information of source code                                            |
| <b>DOI_assigned_to_model_version</b>       | Version of model to which a DOI is assigned                               |
| <b>DOI-filelink</b>                        | DOI link to the released version                                          |
